# Supplementary material
Source: publisher site journal article supplement (https://www.dovepress.com/article/326535)

resting CD4+ memory T cells(p=0.063)

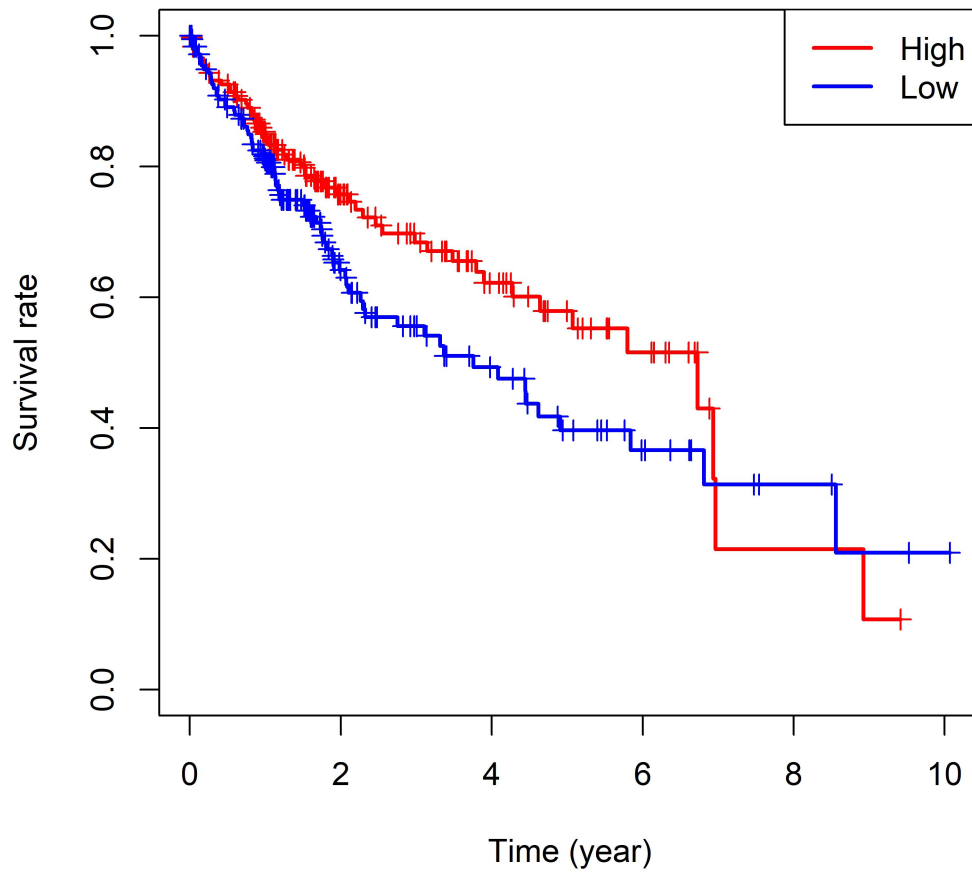

resting dendritic cells(p=0.66)

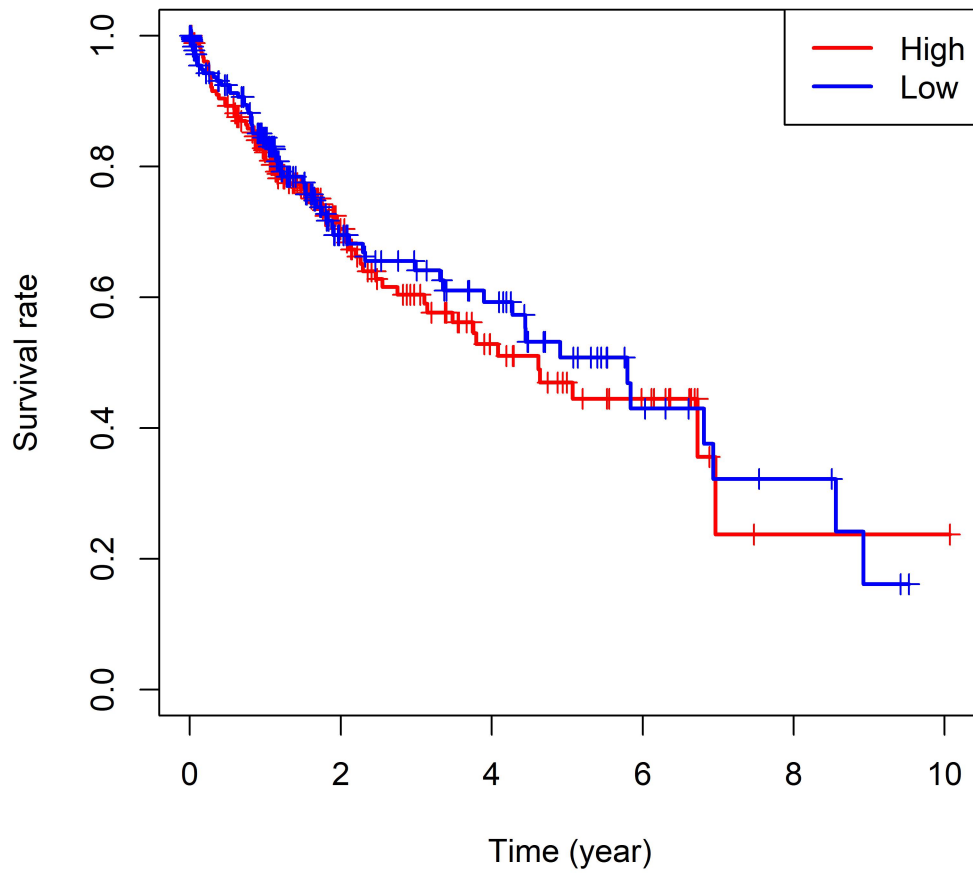

resting mast cells(p=0.488)

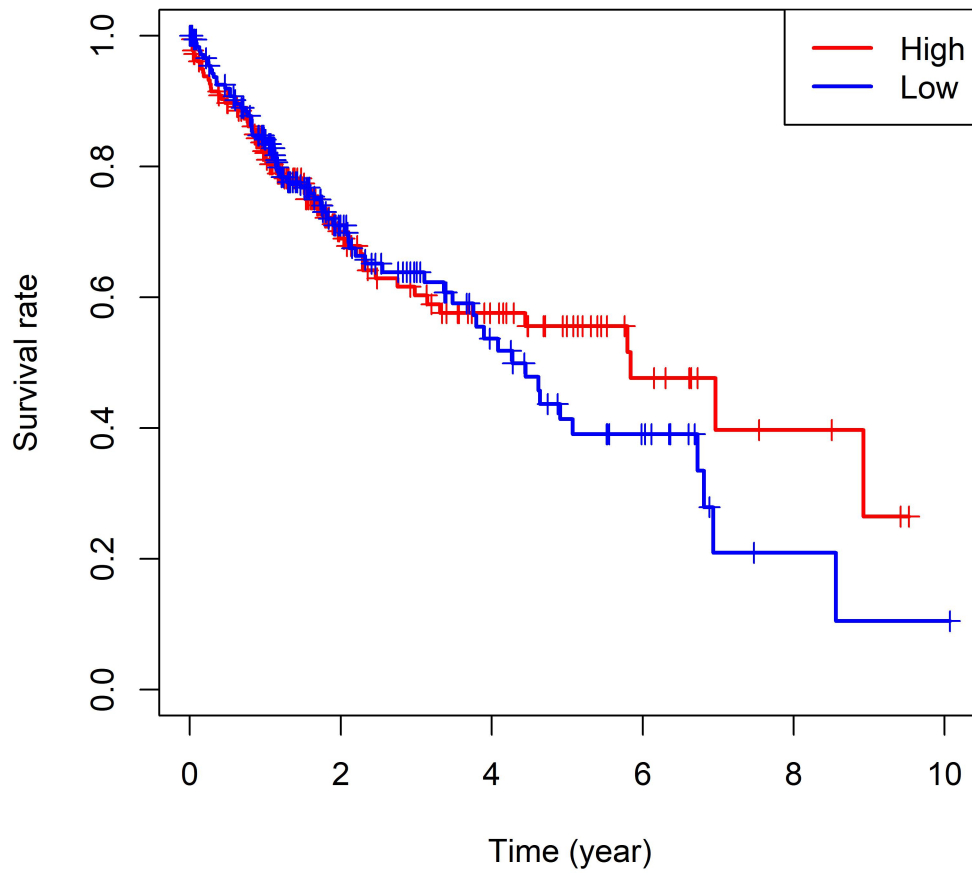

resting NK cells(p=0.958)

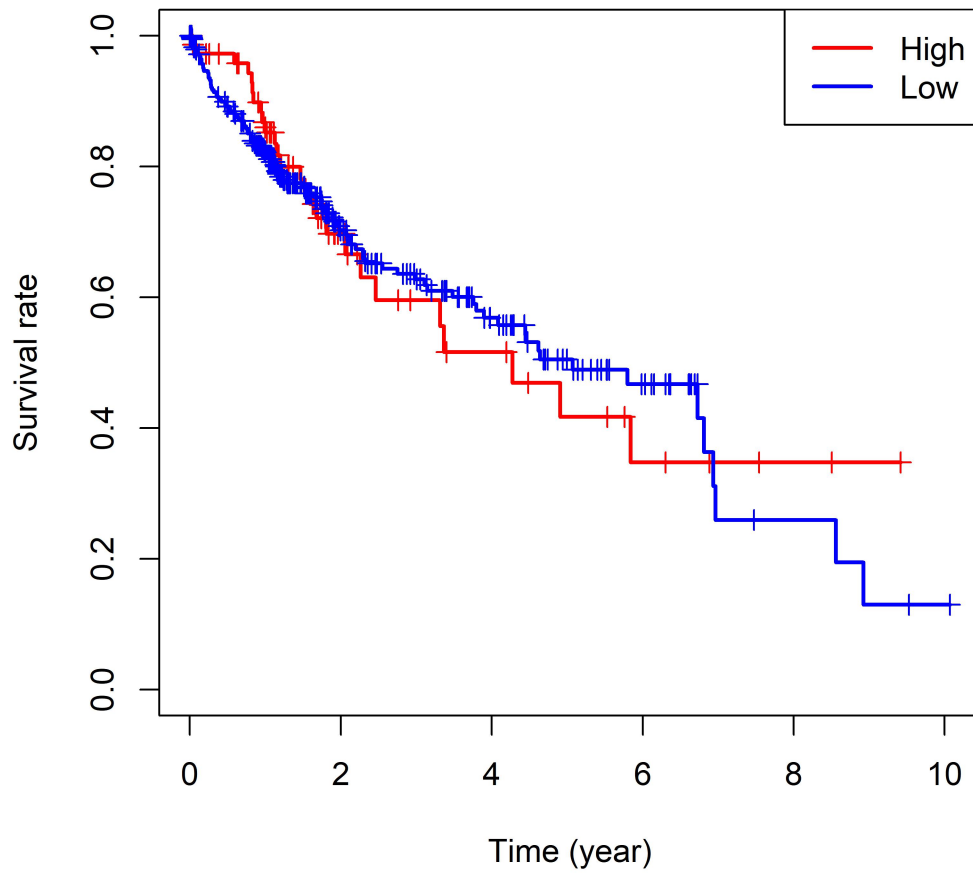

activated CD4+ memory T cells(p=0.412)

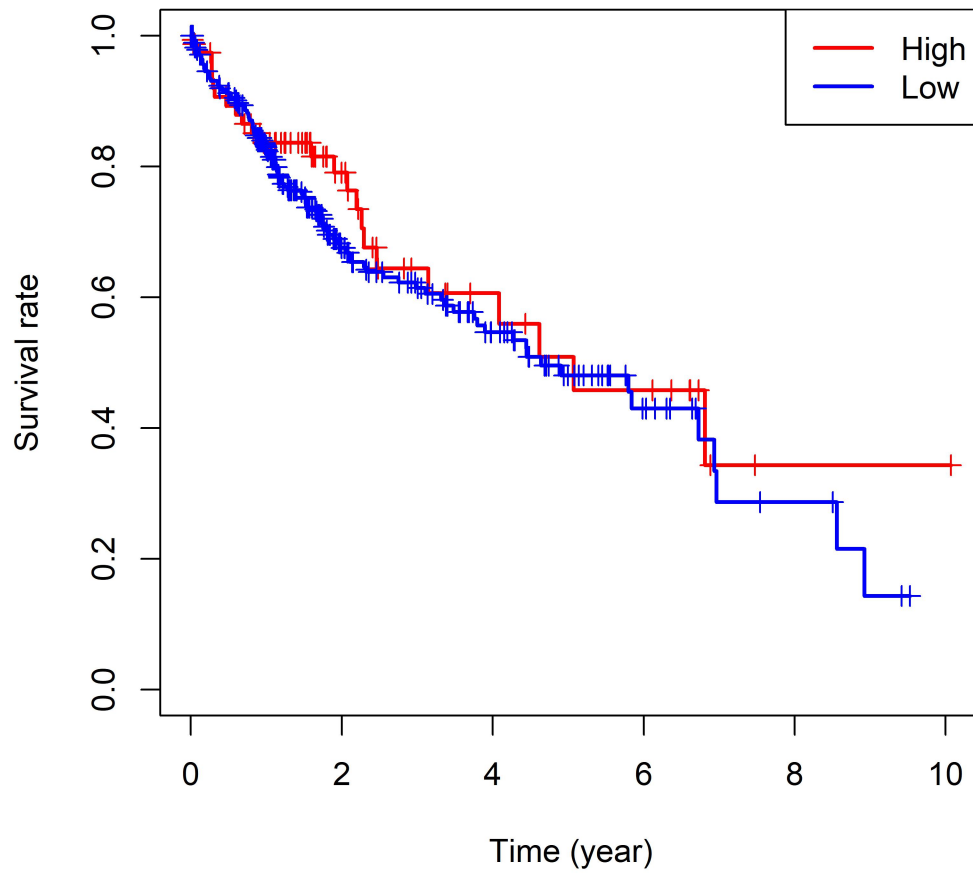

activated dendritic cells(p=0.89)

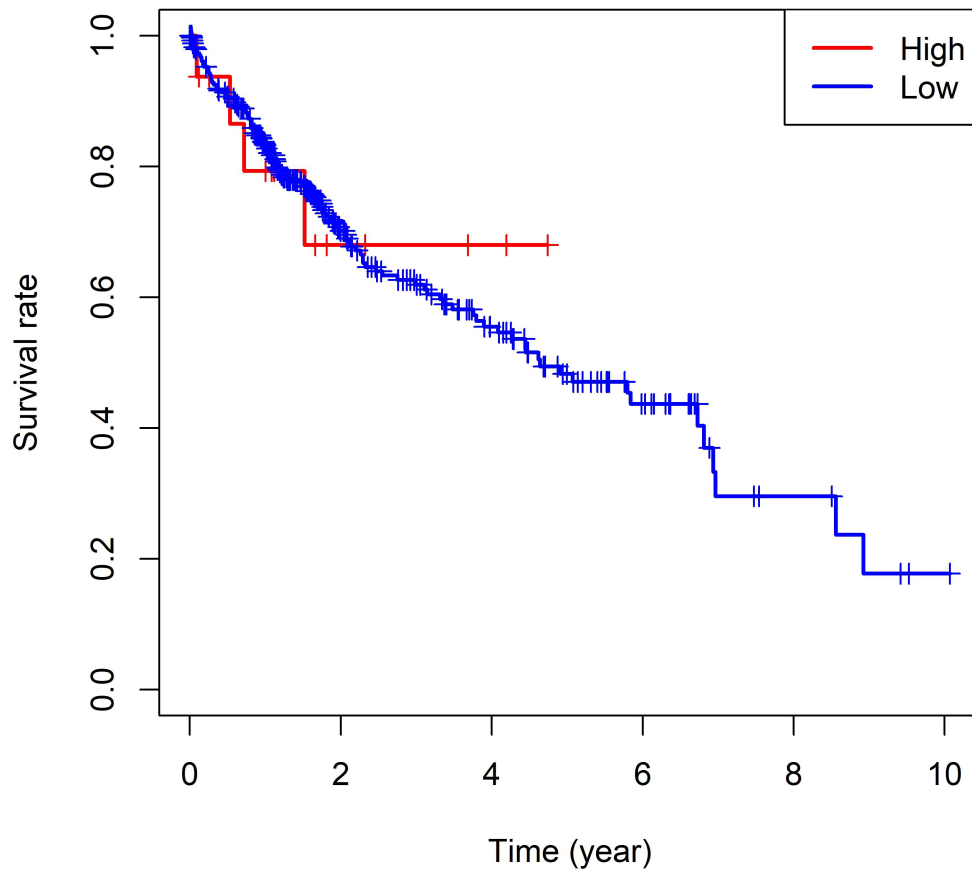

activated mast cells(p=0.385)

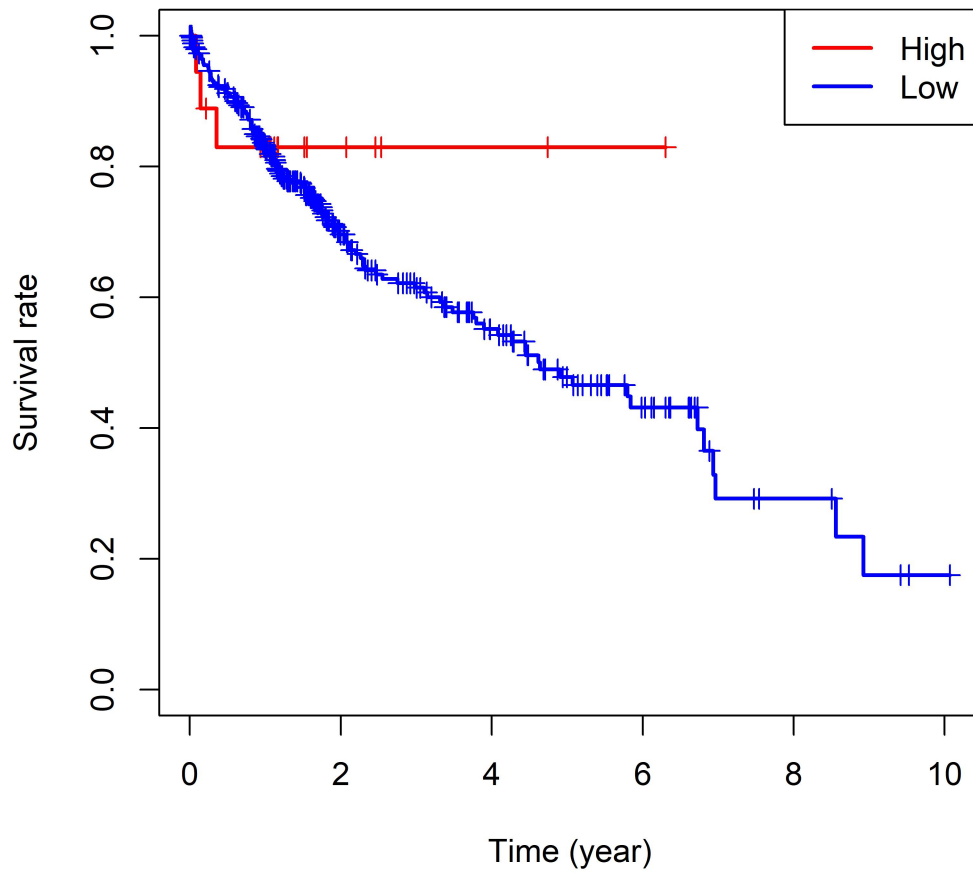

activated NK cells(p=0.847)

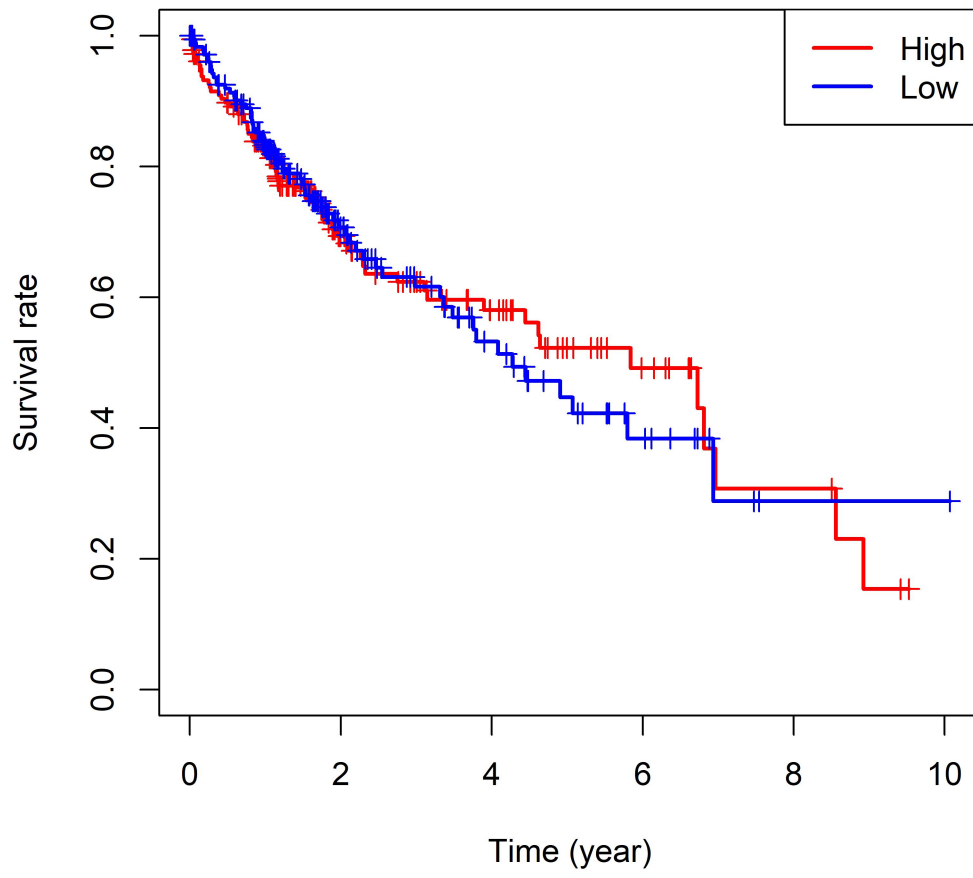



### CD8+ T cells(p=0.18)

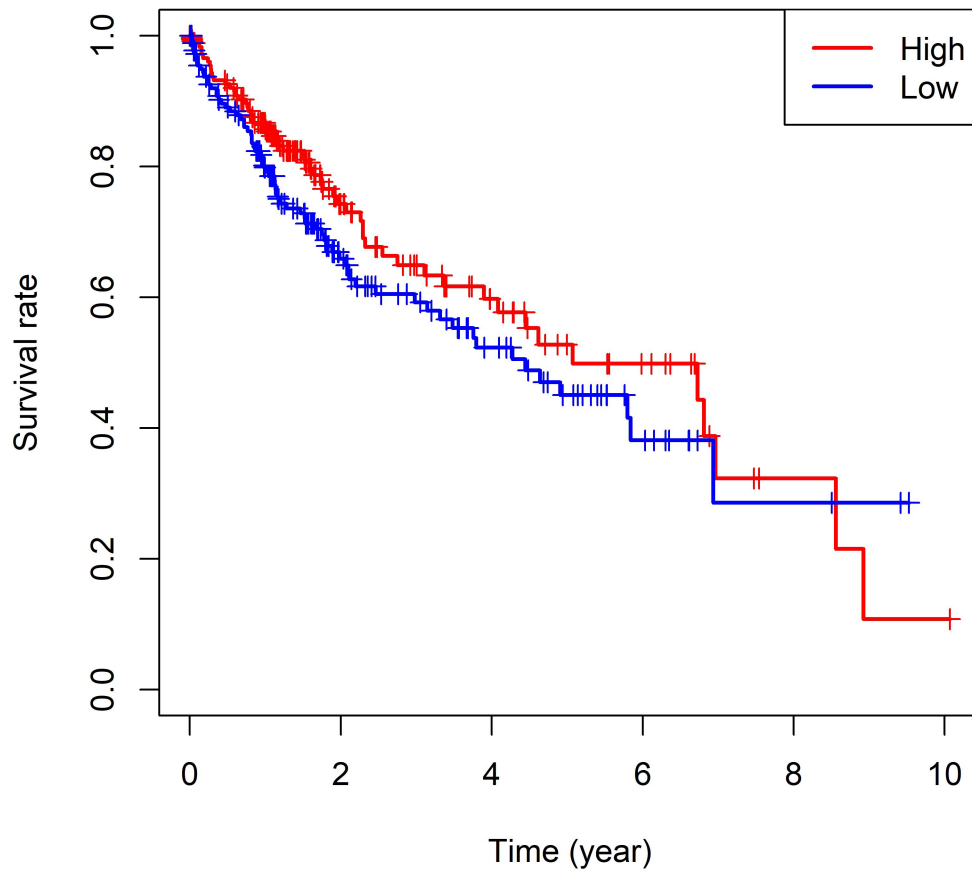

### Eosinophils(p=0.104)

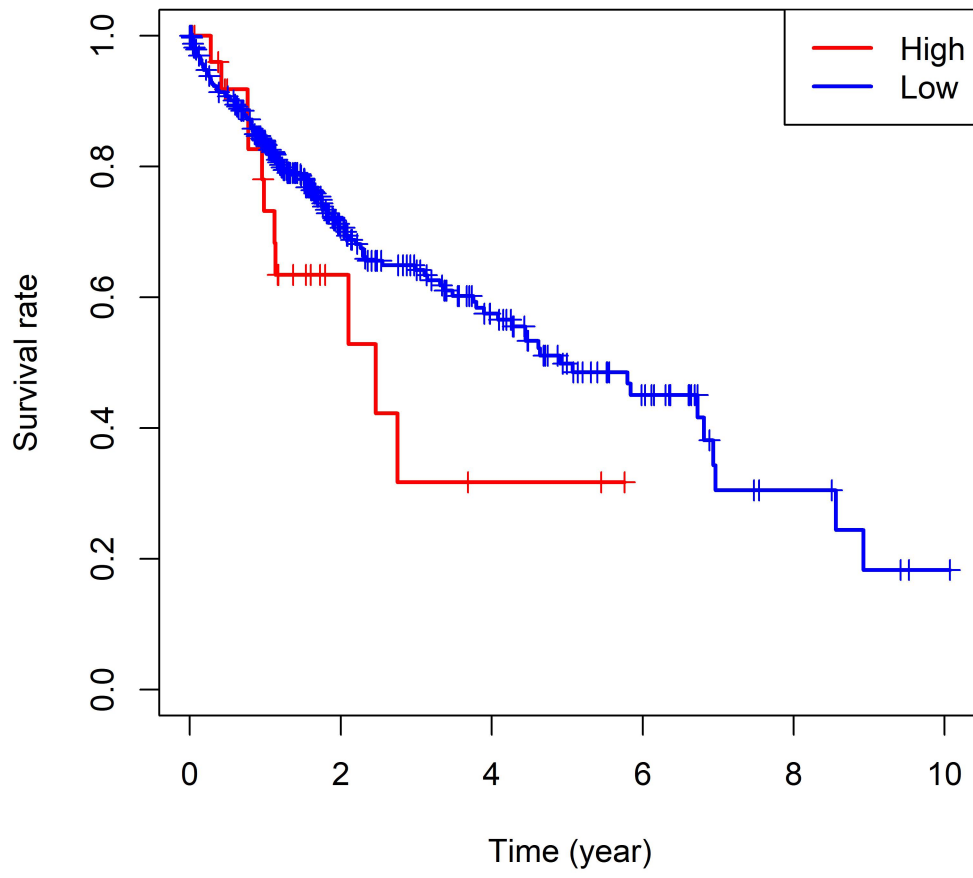

### gamma delta T cells(p=0.47)

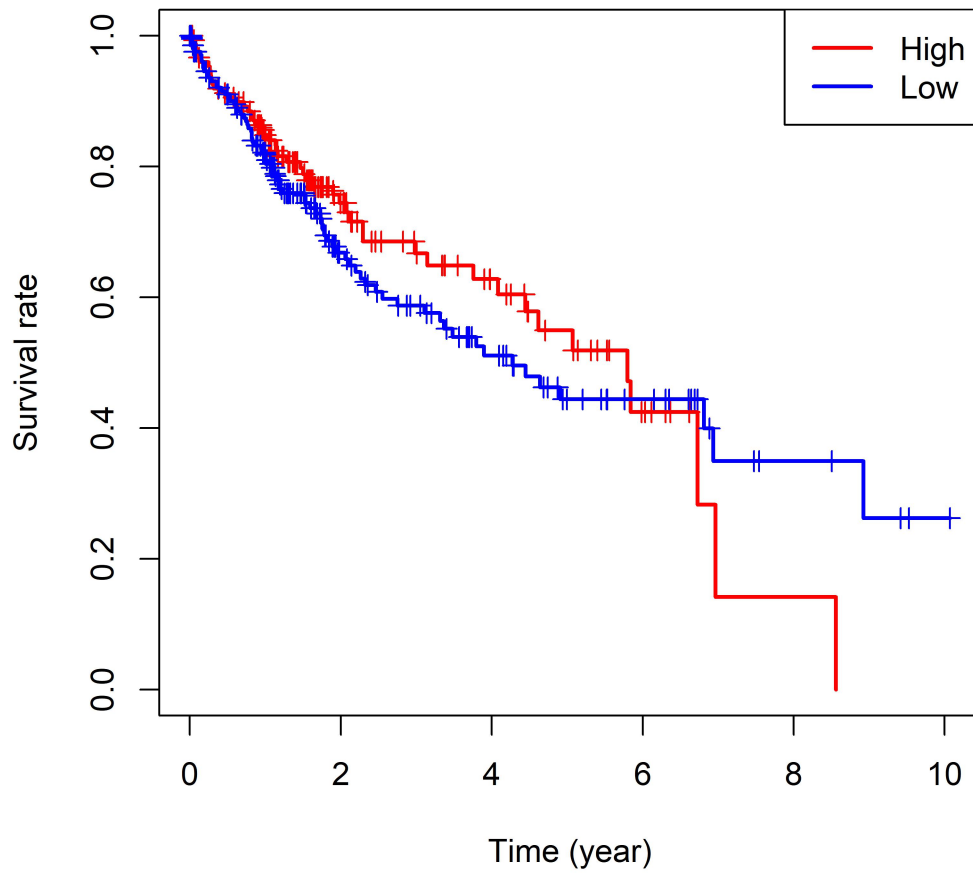

### M1 macrophages(p=0.718)

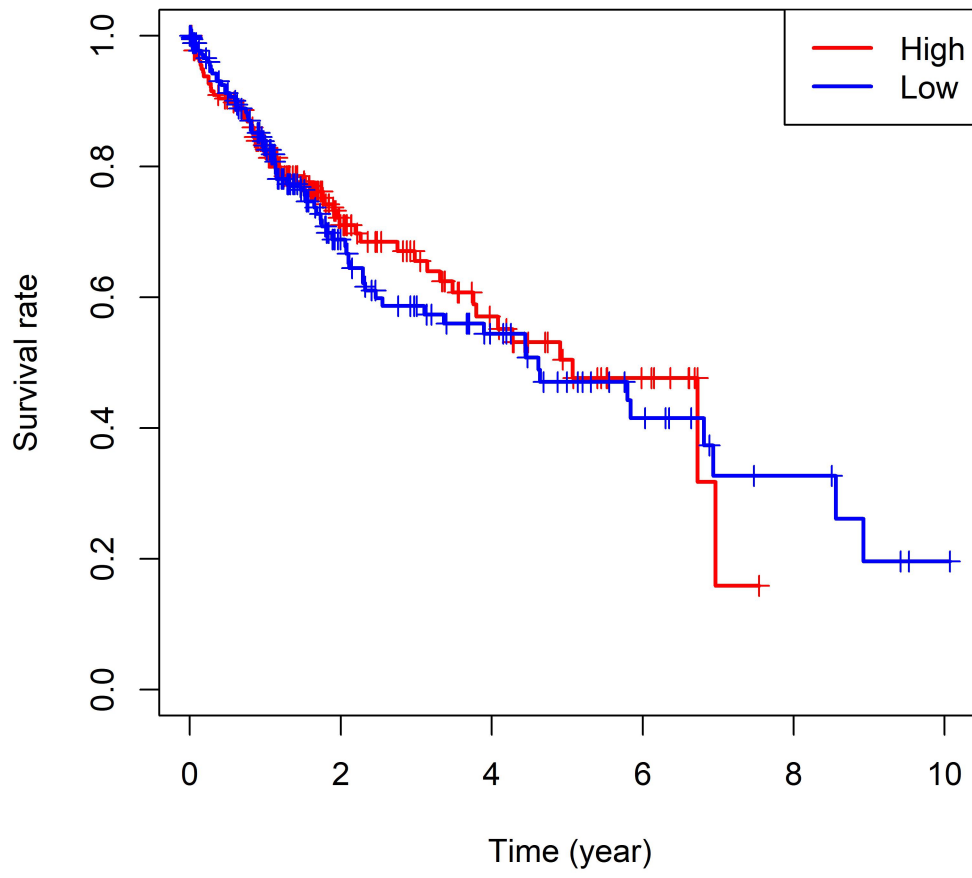

### memory B cells(p=0.214)

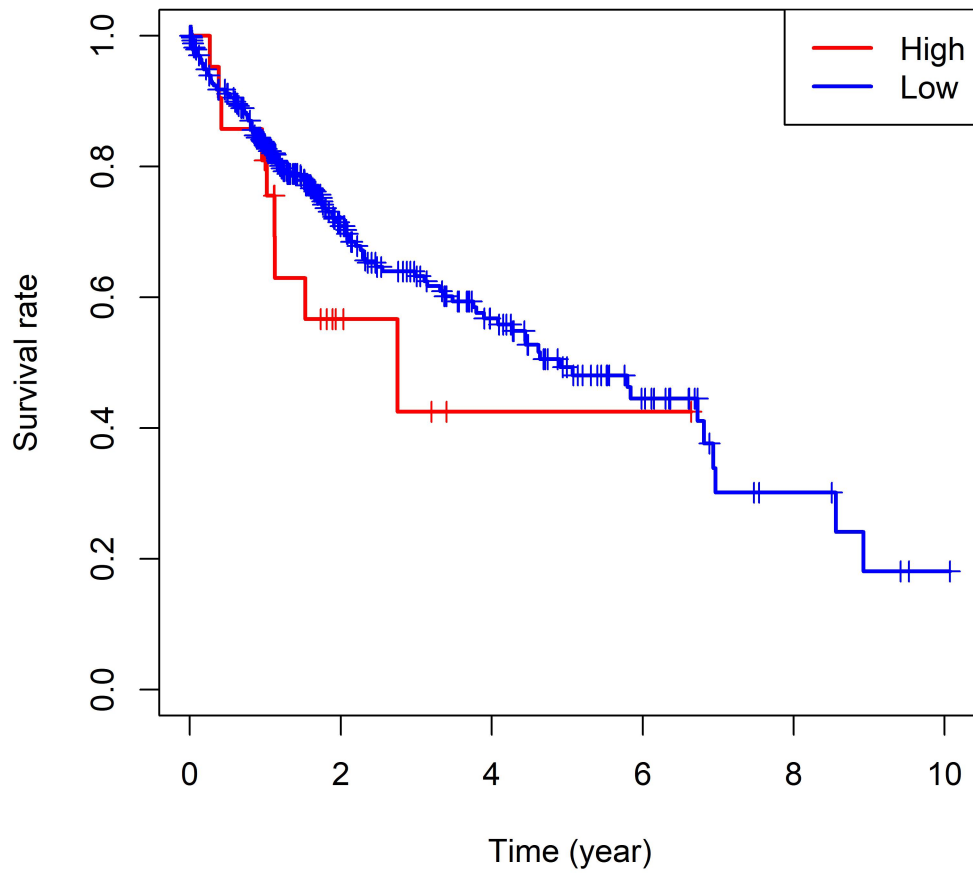

naive B cells(p=0.055)

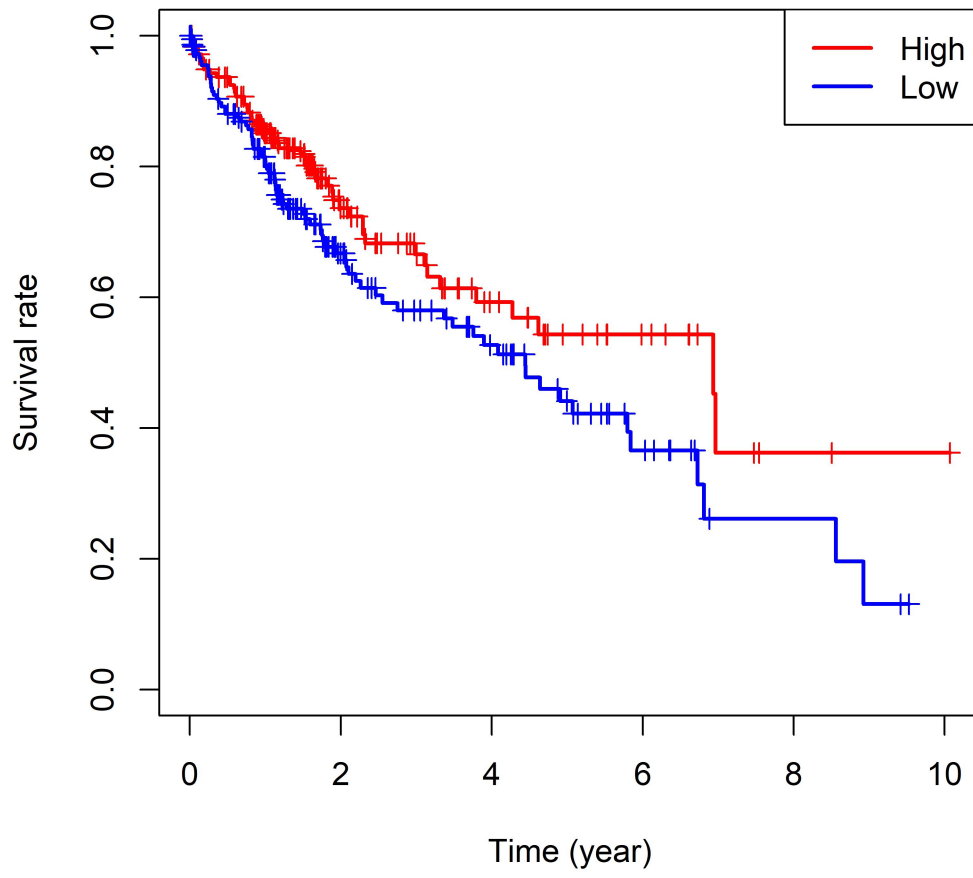

### naive CD4+ T cells(p=0.071)

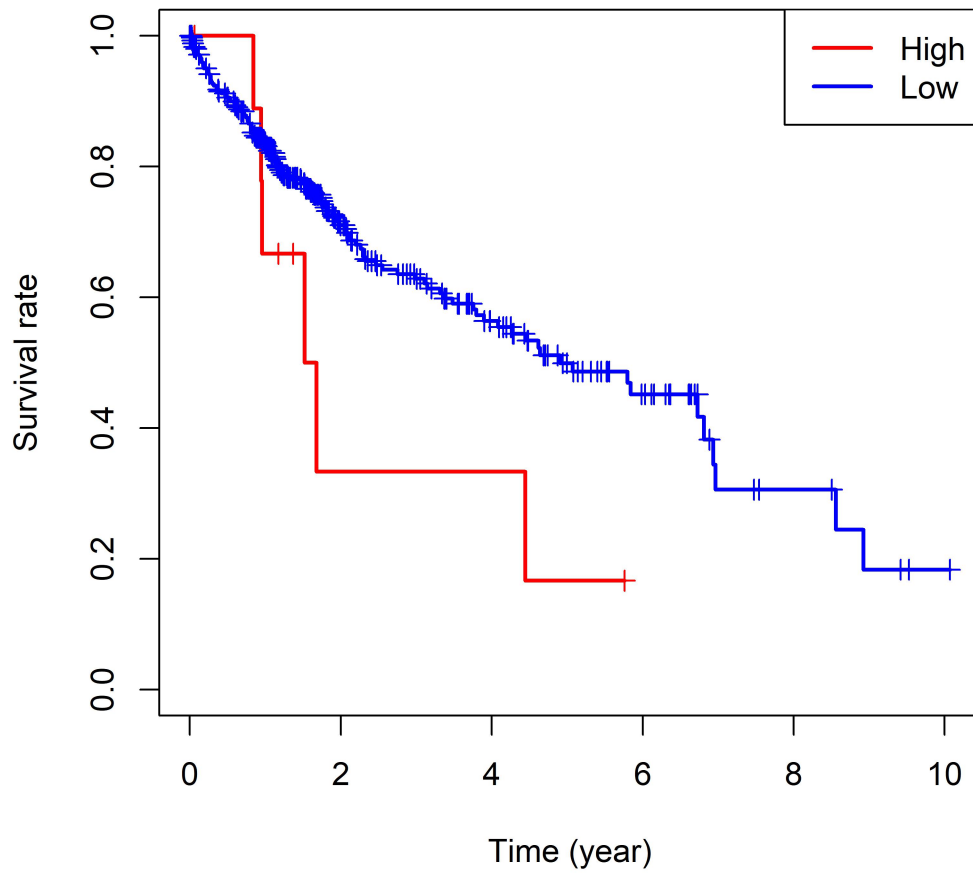

### Neutrophils(p=0.707)

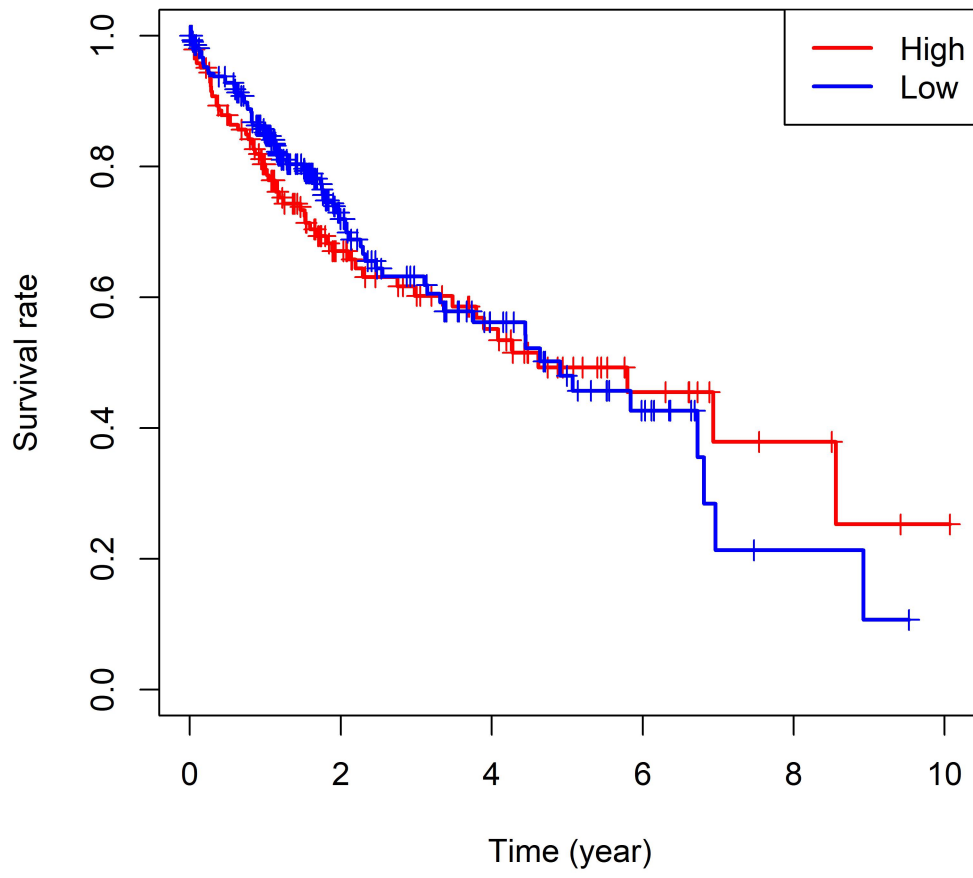



plasma cells(p=0.154)

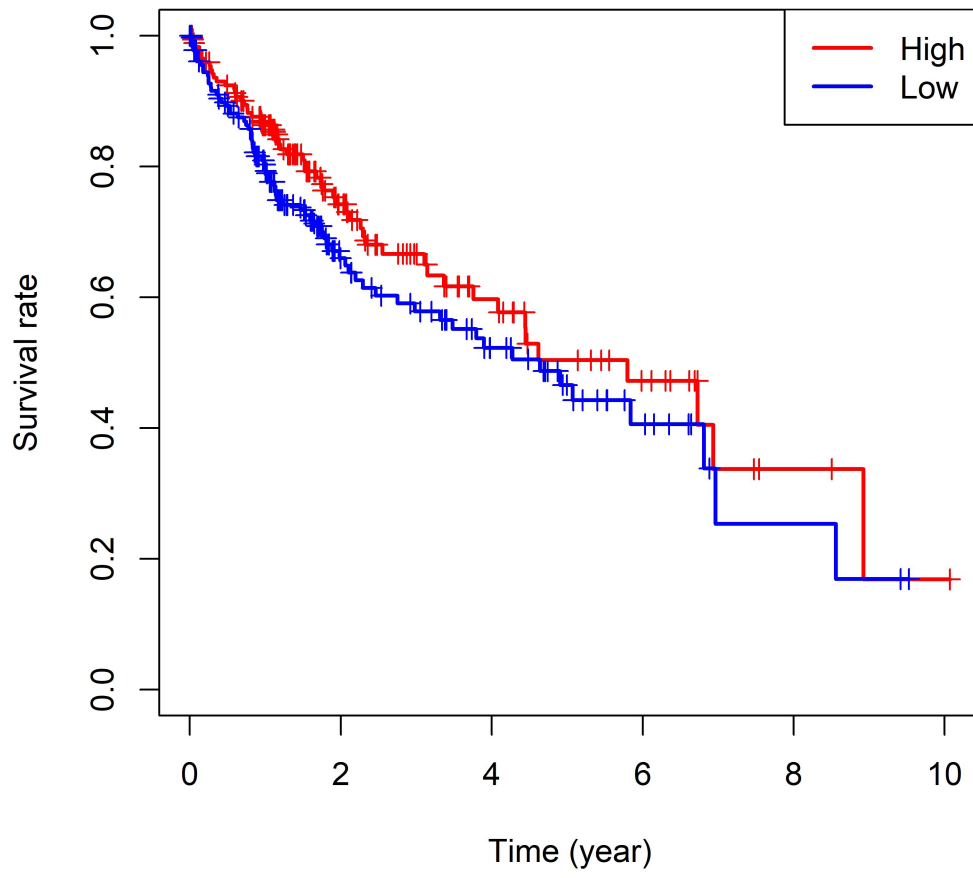

regulatory T cells(p=0.431)

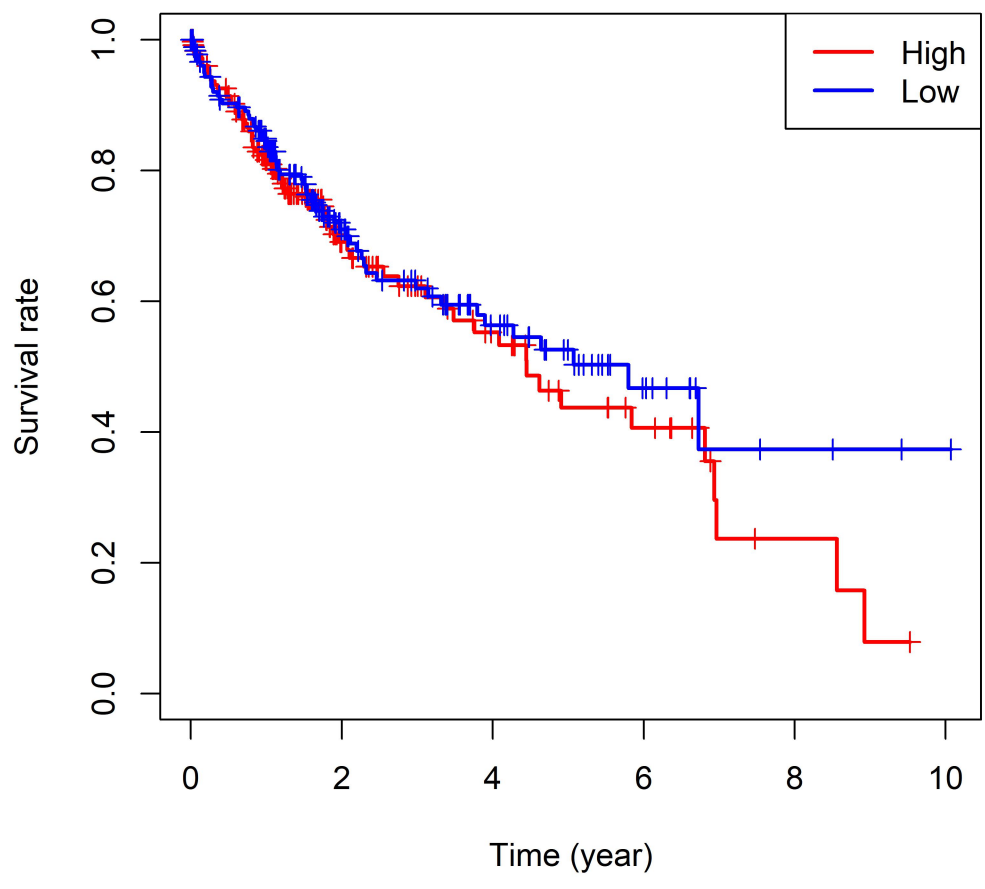

Supplement: Supplementary file 1 [file get_supplementary_file.php]
